# Supplementary material for: Duration of Untreated Psychosis and Brain Function during Verbal Fluency Testing in First-Episode Schizophrenia: A Near-Infrared Spectroscopy Study
Source: PubMed Central journal article supplement (PMC4674798; doi:10.1038/srep18069), 2015-12-10
Supplement: srep18069-s1.pdf [file srep18069-s1.pdf]

**Duration of Untreated Psychosis and Brain Function during Verbal Fluency Testing in First-Episode Schizophrenia: A Near-Infrared Spectroscopy Study**

Po-Han Chou, M.D; Wei-Hao Lin, M.D; Chih-Chien Lin, M.D., M.P.H.; Po-Shun Hou, M.D., M.S; Wan-Rung Li, M.D.; Chia-Chun Hung, M.D; Ching-Po Lin, Ph.D; Tsuo-Hung Lan, M.D., Ph.D.; Chin-Hong Chan, M.D., M.S.

**Supplementary Table S1.**

**Results of paired T-test showing significant increased [oxy-Hb] changes during letter version of verbal fluency test (LFT) in healthy control group.**

| No. of channels | Healthy controls<br>(n=29) |                             |
|-----------------|----------------------------|-----------------------------|
|                 | <i>t-value</i>             | <i>p value</i> <sup>a</sup> |
| CH01            | 5.085                      | 0.000*                      |
| CH02            | 4.543                      | 0.000*                      |
| CH03            | 5.011                      | 0.000*                      |
| CH04            | 2.986                      | 0.006*                      |
| CH05            | 3.523                      | 0.002*                      |
| CH06            | 3.366                      | 0.002*                      |
| CH07            | 2.551                      | 0.018*                      |
| CH08            | 2.469                      | 0.021*                      |
| CH09            | 5.946                      | 0.000*                      |
| CH10            | 0.922                      | 0.366                       |
| CH11            | 6.318                      | 0.000*                      |
| CH12            | 5.046                      | 0.000*                      |
| CH13            | 5.171                      | 0.000*                      |
| CH14            | 7.017                      | 0.000*                      |
| CH15            | 4.803                      | 0.000*                      |
| CH16            | 4.493                      | 0.000*                      |
| CH17            | 4.586                      | 0.000*                      |
| CH18            | 5.402                      | 0.000*                      |
| CH19            | 7.169                      | 0.000*                      |
| CH20            | 5.378                      | 0.000*                      |
| CH21            | 2.543                      | 0.017*                      |
| CH22            | 6.493                      | 0.000*                      |
| CH23            | 5.883                      | 0.000*                      |
| CH24            | 8.756                      | 0.000*                      |
| CH25            | 9.564                      | 0.000*                      |
| CH26            | 8.206                      | 0.000*                      |
| CH27            | 7.451                      | 0.000*                      |
| CH28            | 6.633                      | 0.000*                      |
| CH29            | 7.171                      | 0.000*                      |
| CH30            | 6.007                      | 0.000*                      |
| CH31            | 7.400                      | 0.000*                      |
| CH32            | 7.609                      | 0.000*                      |

|      |        |        |
|------|--------|--------|
| CH33 | 7.339  | 0.000* |
| CH34 | 5.743  | 0.000* |
| CH35 | 10.555 | 0.000* |
| CH36 | 9.505  | 0.000* |
| CH37 | 9.361  | 0.000* |
| CH38 | 7.201  | 0.000* |
| CH39 | 7.287  | 0.000* |
| CH40 | 6.127  | 0.000* |
| CH41 | 6.068  | 0.000* |
| CH42 | 6.464  | 0.000* |
| CH43 | 7.407  | 0.000* |
| CH44 | 7.214  | 0.000* |
| CH45 | 7.990  | 0.000* |
| CH46 | 10.291 | 0.000* |
| CH47 | 9.627  | 0.000* |
| CH48 | 6.534  | 0.000* |
| CH49 | 8.222  | 0.000* |
| CH50 | 9.278  | 0.000* |
| CH51 | 8.114  | 0.000* |
| CH52 | 8.118  | 0.000* |

---

<sup>a</sup> Significance was defined as FDR corrected  $p < 0.04904$ .

**Supplementary Table S2.****Results of paired T-test showing significant increased [oxy-Hb] changes during letter version of verbal fluency test (LFT) in schizophrenia group.**

| No. of channels | Schizophrenia (n=28) |                             |
|-----------------|----------------------|-----------------------------|
|                 | <i>t-value</i>       | <i>p value</i> <sup>a</sup> |
| CH01            | 2.207                | 0.036*                      |
| CH02            | 2.743                | 0.011*                      |
| CH03            | 2.191                | 0.037*                      |
| CH04            | 1.356                | 0.187*                      |
| CH05            | 0.985                | 0.334                       |
| CH06            | 0.929                | 0.362                       |
| CH07            | 0.810                | 0.426                       |
| CH08            | 2.047                | 0.052                       |
| CH09            | 2.777                | 0.010*                      |
| CH10            | 2.286                | 0.031*                      |
| CH11            | 3.093                | 0.005*                      |
| CH12            | 4.624                | 0.000*                      |
| CH13            | 3.033                | 0.006*                      |
| CH14            | 2.448                | 0.021*                      |
| CH15            | 1.107                | 0.279                       |
| CH16            | 1.660                | 0.109                       |
| CH17            | 2.466                | 0.021*                      |
| CH18            | 2.762                | 0.011*                      |
| CH19            | 4.060                | 0.000*                      |
| CH20            | 2.756                | 0.012*                      |
| CH21            | 2.625                | 0.015*                      |
| CH22            | 5.304                | 0.000*                      |
| CH23            | 4.014                | 0.001*                      |
| CH24            | 4.121                | 0.000*                      |
| CH25            | 2.816                | 0.009*                      |
| CH26            | 2.743                | 0.011*                      |
| CH27            | 2.221                | 0.035*                      |
| CH28            | 4.078                | 0.000*                      |
| CH29            | 4.688                | 0.000*                      |
| CH30            | 4.252                | 0.000*                      |
| CH31            | 3.822                | 0.001*                      |
| CH32            | 4.351                | 0.000*                      |

|      |       |                    |
|------|-------|--------------------|
| CH33 | 4.459 | 0.000 <sup>*</sup> |
| CH34 | 4.991 | 0.000 <sup>*</sup> |
| CH35 | 3.423 | 0.002 <sup>*</sup> |
| CH36 | 2.472 | 0.021 <sup>*</sup> |
| CH37 | 2.993 | 0.006 <sup>*</sup> |
| CH38 | 2.600 | 0.016 <sup>*</sup> |
| CH39 | 3.928 | 0.001 <sup>*</sup> |
| CH40 | 5.064 | 0.000 <sup>*</sup> |
| CH41 | 5.111 | 0.000 <sup>*</sup> |
| CH42 | 4.377 | 0.000 <sup>*</sup> |
| CH43 | 2.078 | 0.050              |
| CH44 | 4.181 | 0.000 <sup>*</sup> |
| CH45 | 4.430 | 0.000 <sup>*</sup> |
| CH46 | 3.190 | 0.004 <sup>*</sup> |
| CH47 | 3.231 | 0.004 <sup>*</sup> |
| CH48 | 2.915 | 0.008 <sup>*</sup> |
| CH49 | 2.864 | 0.008 <sup>*</sup> |
| CH50 | 4.980 | 0.000 <sup>*</sup> |
| CH51 | 4.950 | 0.000 <sup>*</sup> |
| CH52 | 4.156 | 0.000 <sup>*</sup> |

---

<sup>a</sup> Significance was defined as FDR corrected  $p < 0.04327$ .

**Supplementary Table S3.****Results of paired T-test showing significant increased [oxy-Hb] changes during category version of verbal fluency test (CFT) in healthy control group.**

| No. of channels | Healthy control<br>(n=29) |                             |
|-----------------|---------------------------|-----------------------------|
|                 | <i>t-value</i>            | <i>p value</i> <sup>a</sup> |
| CH01            | 3.573                     | 0.001*                      |
| CH02            | 3.399                     | 0.002*                      |
| CH03            | 1.762                     | 0.093                       |
| CH04            | 2.306                     | 0.030*                      |
| CH05            | 2.529                     | 0.018*                      |
| CH06            | 2.460                     | 0.022*                      |
| CH07            | 0.245                     | 0.808                       |
| CH08            | 0.919                     | 0.368                       |
| CH09            | 1.106                     | 0.279                       |
| CH10            | 3.298                     | 0.003*                      |
| CH11            | 3.794                     | 0.001*                      |
| CH12            | 4.817                     | 0.000*                      |
| CH13            | 5.134                     | 0.000*                      |
| CH14            | 4.261                     | 0.000*                      |
| CH15            | 3.708                     | 0.001*                      |
| CH16            | 2.764                     | 0.010*                      |
| CH17            | 1.557                     | 0.132                       |
| CH18            | 2.639                     | 0.014*                      |
| CH19            | 5.090                     | 0.000*                      |
| CH20            | 5.623                     | 0.000*                      |
| CH21            | 5.087                     | 0.000*                      |
| CH22            | 4.869                     | 0.000*                      |
| CH23            | 5.829                     | 0.000*                      |
| CH24            | 6.415                     | 0.000*                      |
| CH25            | 6.043                     | 0.000*                      |
| CH26            | 4.660                     | 0.000*                      |
| CH27            | 4.758                     | 0.000*                      |
| CH28            | 5.043                     | 0.000*                      |
| CH29            | 6.339                     | 0.000*                      |
| CH30            | 4.771                     | 0.000*                      |
| CH31            | 5.257                     | 0.000*                      |
| CH32            | 5.788                     | 0.000*                      |

|      |       |                    |
|------|-------|--------------------|
| CH33 | 5.948 | 0.000 <sup>*</sup> |
| CH34 | 6.118 | 0.000 <sup>*</sup> |
| CH35 | 7.567 | 0.000 <sup>*</sup> |
| CH36 | 4.947 | 0.000 <sup>*</sup> |
| CH37 | 4.022 | 0.000 <sup>*</sup> |
| CH38 | 4.492 | 0.000 <sup>*</sup> |
| CH39 | 7.470 | 0.000 <sup>*</sup> |
| CH40 | 5.951 | 0.000 <sup>*</sup> |
| CH41 | 5.721 | 0.000 <sup>*</sup> |
| CH42 | 5.833 | 0.000 <sup>*</sup> |
| CH43 | 6.706 | 0.000 <sup>*</sup> |
| CH44 | 7.049 | 0.000 <sup>*</sup> |
| CH45 | 8.036 | 0.000 <sup>*</sup> |
| CH46 | 7.641 | 0.000 <sup>*</sup> |
| CH47 | 4.768 | 0.000 <sup>*</sup> |
| CH48 | 4.675 | 0.000 <sup>*</sup> |
| CH49 | 6.108 | 0.000 <sup>*</sup> |
| CH50 | 7.452 | 0.000 <sup>*</sup> |
| CH51 | 6.712 | 0.000 <sup>*</sup> |
| CH52 | 6.437 | 0.000 <sup>*</sup> |

---

<sup>a</sup> Significance was defined as FDR corrected  $p < 0.04519$ .

**Supplementary Table S4.****Results of paired T-test showing significant increased [oxy-Hb] changes during category version of verbal fluency test (CFT) in schizophrenia group.**

| No. of channels | Schizophrenia<br>(n=28) |                             |
|-----------------|-------------------------|-----------------------------|
|                 | <i>t-value</i>          | <i>p value</i> <sup>a</sup> |
| CH01            | -0.016                  | 0.987                       |
| CH02            | -1.050                  | 0.304                       |
| CH03            | -0.973                  | 0.339                       |
| CH04            | 0.384                   | 0.704                       |
| CH05            | 0.325                   | 0.748                       |
| CH06            | 1.326                   | 0.198                       |
| CH07            | 0.902                   | 0.375                       |
| CH08            | 0.001                   | 1.000                       |
| CH09            | 1.923                   | 0.068                       |
| CH10            | 0.901                   | 0.377                       |
| CH11            | 2.476                   | 0.020*                      |
| CH12            | 2.042                   | 0.051                       |
| CH13            | 3.364                   | 0.002*                      |
| CH14            | 1.497                   | 0.146                       |
| CH15            | 0.674                   | 0.507                       |
| CH16            | 1.370                   | 0.183                       |
| CH17            | 1.362                   | 0.185                       |
| CH18            | 0.589                   | 0.561                       |
| CH19            | 1.100                   | 0.282                       |
| CH20            | 2.963                   | 0.007*                      |
| CH21            | 1.773                   | 0.088                       |
| CH22            | 3.081                   | 0.005*                      |
| CH23            | 3.294                   | 0.003*                      |
| CH24            | 4.151                   | 0.000*                      |
| CH25            | 2.465                   | 0.020*                      |
| CH26            | 2.336                   | 0.029*                      |
| CH27            | 1.987                   | 0.058                       |
| CH28            | 1.985                   | 0.058                       |
| CH29            | 3.261                   | 0.003*                      |
| CH30            | 3.759                   | 0.001*                      |
| CH31            | 4.228                   | 0.000*                      |
| CH32            | 3.662                   | 0.001*                      |



|      |       |        |
|------|-------|--------|
| CH33 | 3.530 | 0.002* |
| CH34 | 3.241 | 0.003* |
| CH35 | 4.075 | 0.000* |
| CH36 | 2.490 | 0.020* |
| CH37 | 2.640 | 0.014* |
| CH38 | 2.253 | 0.034  |
| CH39 | 3.133 | 0.005* |
| CH40 | 3.582 | 0.001* |
| CH41 | 4.095 | 0.000* |
| CH42 | 3.979 | 0.001* |
| CH43 | 3.624 | 0.001* |
| CH44 | 4.076 | 0.000* |
| CH45 | 3.945 | 0.001* |
| CH46 | 2.990 | 0.006* |
| CH47 | 2.380 | 0.026* |
| CH48 | 2.954 | 0.008* |
| CH49 | 2.894 | 0.008* |
| CH50 | 5.042 | 0.000* |
| CH51 | 3.801 | 0.001* |
| CH52 | 4.276 | 0.000* |

---

<sup>a</sup> Significance was defined as FDR corrected  $p < 0.02981$ .

**Supplementary Table S5.**

**Results of T-test showing significantly higher [oxy-Hb] changes during letter version of verbal fluency test (LFT) in healthy control group than schizophrenia group.**

| No. of channels | <i>t-value</i> | <i>p value</i> <sup>a</sup> |
|-----------------|----------------|-----------------------------|
| CH01            | 2.873          | 0.006*                      |
| CH02            | 1.450          | 0.153                       |
| CH03            | 1.469          | 0.148                       |
| CH04            | 0.988          | 0.327                       |
| CH05            | 2.098          | 0.041                       |
| CH06            | 2.043          | 0.046                       |
| CH07            | 1.663          | 0.104                       |
| CH08            | 0.964          | 0.339                       |
| CH09            | 2.316          | 0.025*                      |
| CH10            | -0.697         | 0.489                       |
| CH11            | 3.588          | 0.001*                      |
| CH12            | 1.638          | 0.108                       |
| CH13            | 1.314          | 0.195                       |
| CH14            | 1.535          | 0.131                       |
| CH15            | 2.363          | 0.022*                      |
| CH16            | 1.759          | 0.084                       |
| CH17            | 1.859          | 0.069                       |
| CH18            | 2.180          | 0.034                       |
| CH19            | 2.254          | 0.028*                      |
| CH20            | 2.279          | 0.027*                      |
| CH21            | 0.253          | 0.801                       |
| CH22            | 2.679          | 0.010*                      |
| CH23            | 1.826          | 0.075                       |
| CH24            | 2.511          | 0.015*                      |
| CH25            | 2.634          | 0.011*                      |
| CH26            | 3.180          | 0.002*                      |
| CH27            | 2.792          | 0.007*                      |
| CH28            | 1.901          | 0.063                       |
| CH29            | 1.906          | 0.062                       |
| CH30            | 2.391          | 0.022*                      |
| CH31            | 2.880          | 0.006*                      |

|      |       |        |
|------|-------|--------|
| CH32 | 3.749 | 0.000* |
| CH33 | 2.373 | 0.021* |
| CH34 | 2.431 | 0.020* |
| CH35 | 2.996 | 0.004* |
| CH36 | 3.361 | 0.001* |
| CH37 | 1.241 | 0.220  |
| CH38 | 1.662 | 0.103  |
| CH39 | 2.281 | 0.027* |
| CH40 | 2.441 | 0.018* |
| CH41 | 2.545 | 0.014* |
| CH42 | 2.803 | 0.007* |
| CH43 | 0.220 | 0.826  |
| CH44 | 2.834 | 0.007* |
| CH45 | 3.444 | 0.001* |
| CH46 | 2.918 | 0.005* |
| CH47 | 2.297 | 0.026* |
| CH48 | 1.884 | 0.065  |
| CH49 | 2.555 | 0.014* |
| CH50 | 2.708 | 0.009* |
| CH51 | 3.482 | 0.001* |
| CH52 | 3.365 | 0.001* |

---

<sup>a</sup> Significance was defined as FDR corrected  $p < 0.02885$ .

**Supplementary Table S6.**

**Results of T-test showing significant increased [oxy-Hb] changes during category version of verbal fluency test (CFT) between healthy control and schizophrenia group.**

| No. of channels | <i>t-value</i> | <i>p value</i> <sup>a</sup> |
|-----------------|----------------|-----------------------------|
| CH01            | 3.076          | 0.004                       |
| CH02            | 1.580          | 0.120                       |
| CH03            | 0.234          | 0.816                       |
| CH04            | 2.096          | 0.041                       |
| CH05            | 2.078          | 0.043                       |
| CH06            | 1.033          | 0.307                       |
| CH07            | 0.901          | 0.372                       |
| CH08            | 0.674          | 0.503                       |
| CH09            | -0.198         | 0.843                       |
| CH10            | 1.207          | 0.238                       |
| CH11            | 1.743          | 0.087                       |
| CH12            | 2.119          | 0.039                       |
| CH13            | 0.171          | 0.866                       |
| CH14            | 1.675          | 0.100                       |
| CH15            | 2.024          | 0.048                       |
| CH16            | 0.920          | 0.361                       |
| CH17            | 0.241          | 0.810                       |
| CH18            | 1.665          | 0.102                       |
| CH19            | 2.408          | 0.020                       |
| CH20            | 1.167          | 0.249                       |
| CH21            | 2.314          | 0.025                       |
| CH22            | 1.538          | 0.130                       |
| CH23            | 1.497          | 0.141                       |
| CH24            | 1.814          | 0.075                       |
| CH25            | 1.967          | 0.055                       |
| CH26            | 1.422          | 0.161                       |
| CH27            | 1.898          | 0.063                       |
| CH28            | 1.454          | 0.152                       |
| CH29            | 1.812          | 0.076                       |
| CH30            | 0.941          | 0.352                       |
| CH31            | 1.770          | 0.083                       |

|      |       |       |
|------|-------|-------|
| CH32 | 2.516 | 0.015 |
| CH33 | 1.430 | 0.158 |
| CH34 | 1.861 | 0.068 |
| CH35 | 1.843 | 0.072 |
| CH36 | 1.746 | 0.087 |
| CH37 | 0.166 | 0.869 |
| CH38 | 0.565 | 0.574 |
| CH39 | 1.516 | 0.136 |
| CH40 | 2.869 | 0.007 |
| CH41 | 1.248 | 0.218 |
| CH42 | 2.398 | 0.020 |
| CH43 | 2.478 | 0.017 |
| CH44 | 1.834 | 0.073 |
| CH45 | 2.328 | 0.024 |
| CH46 | 1.953 | 0.056 |
| CH47 | 0.914 | 0.365 |
| CH48 | 0.592 | 0.562 |
| CH49 | 1.644 | 0.112 |
| CH50 | 2.717 | 0.009 |
| CH51 | 2.462 | 0.017 |
| CH52 | 1.458 | 0.150 |

---

<sup>a</sup> Significance was defined as FDR corrected  $p < 0.00096$ .

**Supplementary Table S7.****Results of Spearman's rank correlation between [oxy-Hb] changes during letter version of verbal fluency test (LFT) and DUP.**

| No. of channels | <i>rho</i> | <i>p</i> value <sup>a</sup> |
|-----------------|------------|-----------------------------|
| CH01            | -0.276     | 0.163                       |
| CH02            | 0.032      | 0.876                       |
| CH03            | 0.051      | 0.796                       |
| CH04            | -0.193     | 0.334                       |
| CH05            | -0.284     | 0.144                       |
| CH06            | -0.151     | 0.462                       |
| CH07            | -0.038     | 0.861                       |
| CH08            | -0.188     | 0.367                       |
| CH09            | 0.262      | 0.196                       |
| CH10            | 0.037      | 0.859                       |
| CH11            | 0.039      | 0.842                       |
| CH12            | -0.132     | 0.521                       |
| CH13            | -0.086     | 0.670                       |
| CH14            | -0.088     | 0.658                       |
| CH15            | -0.225     | 0.280                       |
| CH16            | -0.153     | 0.436                       |
| CH17            | -0.267     | 0.187                       |
| CH18            | -0.302     | 0.133                       |
| CH19            | -0.442     | 0.027                       |
| CH20            | -0.239     | 0.272                       |
| CH21            | -0.289     | 0.170                       |
| CH22            | -0.108     | 0.598                       |
| CH23            | -0.308     | 0.175                       |
| CH24            | -0.197     | 0.325                       |
| CH25            | -0.101     | 0.615                       |
| CH26            | -0.198     | 0.312                       |
| CH27            | -0.316     | 0.101                       |
| CH28            | -0.329     | 0.094                       |
| CH29            | -0.417     | 0.030                       |
| CH30            | -0.162     | 0.507                       |
| CH31            | -0.123     | 0.576                       |
| CH32            | -0.310     | 0.140                       |
| CH33            | -0.218     | 0.284                       |

|      |        |       |
|------|--------|-------|
| CH34 | -0.302 | 0.151 |
| CH35 | -0.012 | 0.954 |
| CH36 | -0.103 | 0.617 |
| CH37 | 0.077  | 0.709 |
| CH38 | -0.208 | 0.319 |
| CH39 | -0.238 | 0.241 |
| CH40 | -0.404 | 0.041 |
| CH41 | -0.063 | 0.759 |
| CH42 | -0.332 | 0.113 |
| CH43 | -0.278 | 0.170 |
| CH44 | -0.307 | 0.144 |
| CH45 | -0.187 | 0.380 |
| CH46 | 0.094  | 0.642 |
| CH47 | 0.123  | 0.558 |
| CH48 | 0.223  | 0.284 |
| CH49 | 0.106  | 0.606 |
| CH50 | -0.146 | 0.477 |
| CH51 | -0.023 | 0.910 |
| CH52 | 0.097  | 0.669 |

---

<sup>a</sup> Significance was defined as FDR corrected  $p < 0.00096$ .

**Supplementary Table S8.**

**Results of Spearman's rank correlation between [oxy-Hb] changes during category version of verbal fluency test (CFT) and DUP.**

| No. of channels | <i>rho</i> | <i>p</i> value <sup>a</sup> |
|-----------------|------------|-----------------------------|
| CH01            | -0.218     | 0.275                       |
| CH02            | -0.097     | 0.636                       |
| CH03            | -0.007     | 0.970                       |
| CH04            | 0.033      | 0.868                       |
| CH05            | 0.031      | 0.880                       |
| CH06            | -0.187     | 0.382                       |
| CH07            | 0.239      | 0.240                       |
| CH08            | 0.366      | 0.072                       |
| CH09            | 0.144      | 0.511                       |
| CH10            | 0.132      | 0.528                       |
| CH11            | 0.095      | 0.639                       |
| CH12            | -0.139     | 0.480                       |
| CH13            | -0.155     | 0.442                       |
| CH14            | 0.112      | 0.571                       |
| CH15            | -0.182     | 0.384                       |
| CH16            | 0.046      | 0.823                       |
| CH17            | -0.163     | 0.417                       |
| CH18            | -0.044     | 0.831                       |
| CH19            | -0.005     | 0.980                       |
| CH20            | -0.278     | 0.199                       |
| CH21            | -0.383     | 0.054                       |
| CH22            | -0.031     | 0.880                       |
| CH23            | -0.222     | 0.287                       |
| CH24            | -0.068     | 0.731                       |
| CH25            | 0.024      | 0.903                       |
| CH26            | 0.211      | 0.323                       |
| CH27            | 0.036      | 0.858                       |
| CH28            | -0.142     | 0.488                       |
| CH29            | -0.076     | 0.714                       |
| CH30            | -0.234     | 0.294                       |
| CH31            | -0.299     | 0.156                       |
| CH32            | -0.065     | 0.752                       |



|      |        |       |
|------|--------|-------|
| CH33 | -0.112 | 0.578 |
| CH34 | -0.185 | 0.366 |
| CH35 | 0.015  | 0.942 |
| CH36 | 0.120  | 0.568 |
| CH37 | 0.295  | 0.152 |
| CH38 | -0.110 | 0.599 |
| CH39 | -0.132 | 0.531 |
| CH40 | -0.127 | 0.537 |
| CH41 | -0.030 | 0.887 |
| CH42 | -0.260 | 0.200 |
| CH43 | -0.091 | 0.666 |
| CH44 | -0.229 | 0.282 |
| CH45 | -0.084 | 0.678 |
| CH46 | 0.116  | 0.574 |
| CH47 | 0.268  | 0.206 |
| CH48 | 0.198  | 0.376 |
| CH49 | 0.162  | 0.460 |
| CH50 | -0.146 | 0.467 |
| CH51 | -0.132 | 0.511 |
| CH52 | -0.101 | 0.616 |

---

<sup>a</sup> Significance was defined as FDR corrected  $p < 0.00096$ .

**Supplementary Table S9.****Results of Spearman's rank correlation between [oxy-Hb] changes during letter version of verbal fluency test (LFT) and DOI.<sup>a</sup>**

| No. of channels | <i>rho</i> | <i>p</i> value <sup>b</sup> |
|-----------------|------------|-----------------------------|
| CH01            | -0.302     | 0.125                       |
| CH02            | -0.068     | 0.742                       |
| CH03            | -0.037     | 0.853                       |
| CH04            | -0.343     | 0.080                       |
| CH05            | -0.395     | 0.038                       |
| CH06            | -0.280     | 0.165                       |
| CH07            | -0.186     | 0.385                       |
| CH08            | -0.271     | 0.190                       |
| CH09            | 0.191      | 0.349                       |
| CH10            | -0.016     | 0.940                       |
| CH11            | -0.059     | 0.766                       |
| CH12            | -0.241     | 0.235                       |
| CH13            | -0.141     | 0.484                       |
| CH14            | -0.203     | 0.301                       |
| CH15            | -0.375     | 0.065                       |
| CH16            | -0.307     | 0.112                       |
| CH17            | -0.394     | 0.046                       |
| CH18            | -0.412     | 0.036                       |
| CH19            | -0.493     | 0.012                       |
| CH20            | -0.309     | 0.151                       |
| CH21            | -0.390     | 0.060                       |
| CH22            | -0.176     | 0.390                       |
| CH23            | -0.307     | 0.175                       |
| CH24            | -0.249     | 0.210                       |
| CH25            | -0.216     | 0.280                       |
| CH26            | -0.350     | 0.068                       |
| CH27            | -0.407     | 0.031                       |
| CH28            | -0.462     | 0.015                       |
| CH29            | -0.514     | 0.006                       |
| CH30            | -0.314     | 0.190                       |
| CH31            | -0.318     | 0.139                       |
| CH32            | -0.384     | 0.064                       |
| CH33            | -0.269     | 0.184                       |

|      |        |       |
|------|--------|-------|
| CH34 | -0.317 | 0.131 |
| CH35 | -0.111 | 0.580 |
| CH36 | -0.251 | 0.217 |
| CH37 | -0.104 | 0.612 |
| CH38 | -0.275 | 0.183 |
| CH39 | -0.335 | 0.095 |
| CH40 | -0.526 | 0.006 |
| CH41 | -0.085 | 0.679 |
| CH42 | -0.481 | 0.017 |
| CH43 | -0.319 | 0.112 |
| CH44 | -0.422 | 0.040 |
| CH45 | -0.283 | 0.179 |
| CH46 | -0.049 | 0.808 |
| CH47 | -0.061 | 0.773 |
| CH48 | 0.049  | 0.815 |
| CH49 | 0.046  | 0.823 |
| CH50 | -0.276 | 0.172 |
| CH51 | -0.094 | 0.648 |
| CH52 | -0.016 | 0.942 |

---

<sup>a</sup>Each DOI value was transformed to the base 10 logarithm (log DOI)

<sup>b</sup>Significance was defined as FDR corrected  $p < 0.00096$ .

**Supplementary Table S10.****Results of Spearman's rank correlation between [oxy-Hb] changes during category version of verbal fluency test (CFT) and DOI.**

| No. of channels | <i>rho</i> | <i>p</i> value <sup>a</sup> |
|-----------------|------------|-----------------------------|
| CH01            | -0.301     | 0.127                       |
| CH02            | -0.153     | 0.457                       |
| CH03            | -0.007     | 0.970                       |
| CH04            | -0.048     | 0.808                       |
| CH05            | -0.065     | 0.748                       |
| CH06            | -0.186     | 0.384                       |
| CH07            | 0.292      | 0.147                       |
| CH08            | 0.304      | 0.139                       |
| CH09            | -0.009     | 0.968                       |
| CH10            | 0.043      | 0.837                       |
| CH11            | 0.041      | 0.839                       |
| CH12            | -0.189     | 0.335                       |
| CH13            | -0.191     | 0.339                       |
| CH14            | 0.033      | 0.866                       |
| CH15            | -0.307     | 0.136                       |
| CH16            | -0.043     | 0.833                       |
| CH17            | -0.168     | 0.402                       |
| CH18            | -0.094     | 0.649                       |
| CH19            | -0.134     | 0.513                       |
| CH20            | -0.376     | 0.077                       |
| CH21            | -0.500     | 0.009                       |
| CH22            | -0.151     | 0.461                       |
| CH23            | -0.244     | 0.239                       |
| CH24            | -0.143     | 0.468                       |
| CH25            | -0.072     | 0.716                       |
| CH26            | 0.052      | 0.810                       |
| CH27            | -0.100     | 0.620                       |
| CH28            | -0.214     | 0.295                       |
| CH29            | -0.200     | 0.328                       |
| CH30            | -0.412     | 0.057                       |
| CH31            | -0.412     | 0.046                       |
| CH32            | -0.215     | 0.291                       |
| CH33            | -0.190     | 0.342                       |

|      |        |       |
|------|--------|-------|
| CH34 | -0.259 | 0.202 |
| CH35 | -0.098 | 0.626 |
| CH36 | -0.021 | 0.921 |
| CH37 | 0.155  | 0.460 |
| CH38 | -0.240 | 0.248 |
| CH39 | -0.255 | 0.218 |
| CH40 | -0.213 | 0.295 |
| CH41 | -0.071 | 0.735 |
| CH42 | -0.365 | 0.067 |
| CH43 | -0.242 | 0.244 |
| CH44 | -0.312 | 0.137 |
| CH45 | -0.152 | 0.449 |
| CH46 | 0.018  | 0.930 |
| CH47 | 0.169  | 0.429 |
| CH48 | 0.083  | 0.713 |
| CH49 | 0.059  | 0.788 |
| CH50 | -0.317 | 0.107 |
| CH51 | -0.136 | 0.499 |
| CH52 | -0.176 | 0.380 |

---

<sup>a</sup>Each DOI value was transformed to the base 10 logarithm (log DOI)

<sup>b</sup>Significance was defined as FDR corrected  $p < 0.00096$ .

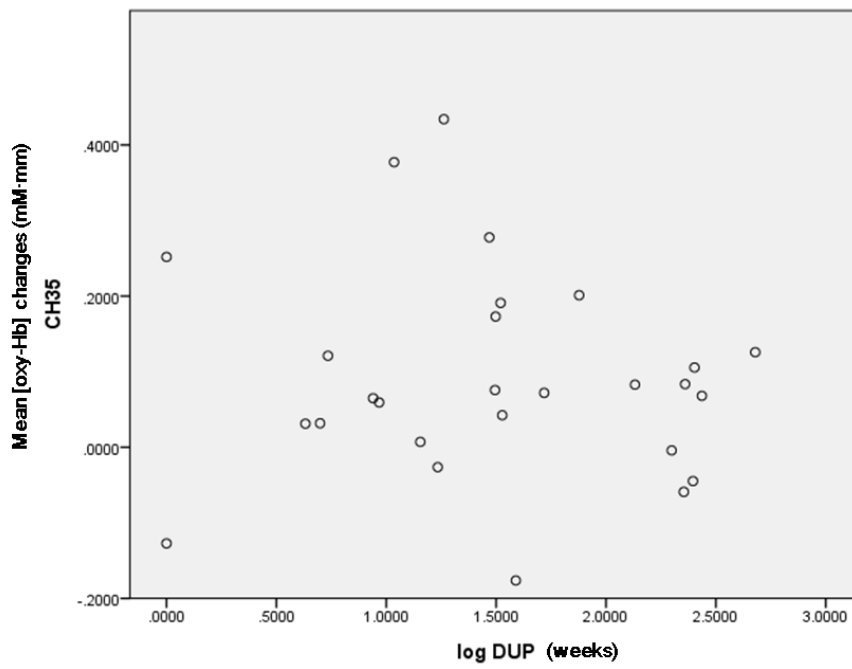

**Supplementary Figure S1.** This figure illustrates correlations between the mean [oxy-Hb] changes during LFT and DUP in FES patients. The scatter plot illustrates typical nonsignificant channel in ch35. (Spearman's rank correlation coefficient  $\rho = -0.01$ , n.s.)

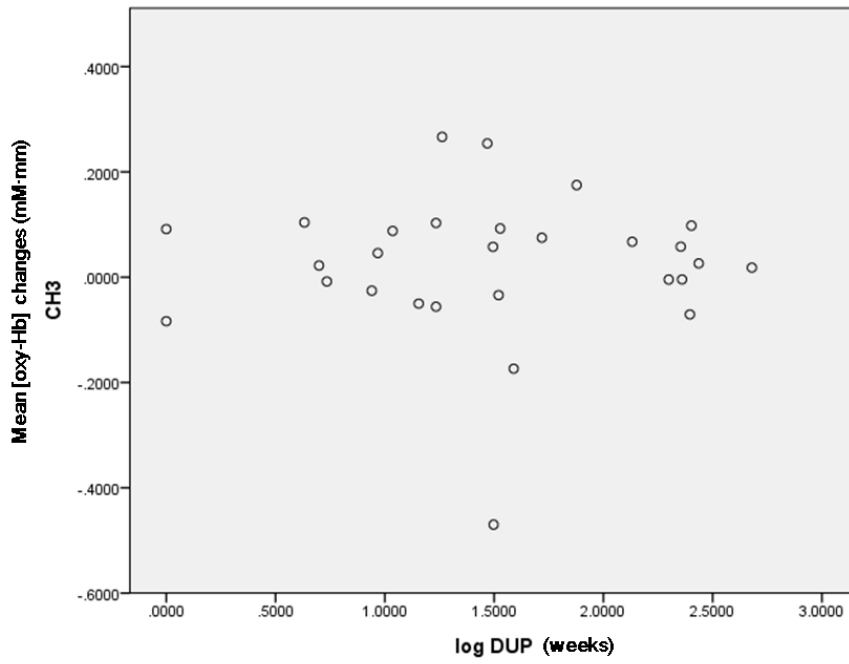

**Supplementary Figure S2.** This figure illustrates correlations between the mean [oxy-Hb] changes during CFT and DUP in FES patients. The scatter plot illustrates typical nonsignificant channel in ch3. (Spearman's rank correlation coefficient  $\rho = -0.007$ , n.s.)
